# Supplementary material for: Healthcare Provider Perspectives on Digital and Interprofessional Medication Management in Chronically Ill Older Adults of Turkish Descent in Germany: A Qualitative Structuring Content Analysis
Source: Frontiers journal article supplement (doi:10.3389/fpubh.2022.838427), 2022-06-02
Supplement: Table_1.pdf [file Table_1.pdf]

1. Health conditions

1.1. Health conditions experienced by elderly migrants of Turkish descent

1.2. Comparisons between patients of Turkish descent and patients without migration backgrounds

1.3. Healthcare utilisation among elderly migrants

2. Medication

2.1. Medication taken by elderly migrants

2.2. Perceived extent of polypharmacy (taking more than 5 different types of medication concurrently) among elderly migrants

2.3. Utilisation of- and attitudes to medication among elderly migrants

2.4. Prescription and consultation practices

2.5. Gender differences in medication use

2.6. Evidence and consequences of polypharmacy

3. Expectations in relation to medication

3.1. Expectations held by patients

3.2. Expectations held by family members

4. Barriers and resources

4.1. Barriers on the societal level

4.2. Barriers on the healthcare system and organizational/institutional level

4.3. Barriers on the personnel level

4.4. Barriers on the patient level (including family members)

4.5. Support needs

4.6. Resources/coping strategies

5. Interprofessional cooperation

5.1. Successful interprofessional cooperation

5.2. Poorly functioning or absent interprofessional cooperation

6. Web-Application

6.1. Requirements for an application serving elderly migrants

6.2. Requirements for an application aiming to improve interprofessional cooperation

6.3. Challenges for an application serving elderly migrants

6.4. Challenges for an application aiming to improve interprofessional cooperation

7. Potential for improvement: Existing approaches, examples of good practice
